# Supplementary material for: Screening for protein-protein interactions using Förster resonance energy transfer (FRET) and fluorescence lifetime imaging microscopy (FLIM)
Source: PubMed Central journal article supplement (PMC4919659; doi:10.1038/srep28186), 2016-06-24
Supplement: srep28186-s1.pdf [file srep28186-s1.pdf]

## Supplementary information

for the paper:

### Screening for protein-protein interactions using Förster resonance energy transfer (FRET) and fluorescence lifetime imaging microscopy (FLIM)

*Anca Margineanu<sup>1\*</sup>, Jia Jia Chan<sup>2\*\*</sup>, Douglas J. Kelly<sup>1,3\*\*</sup>, Sean C. Warren<sup>1,3\*\*</sup>, Delphine Flatters<sup>4</sup>, Sunil Kumar<sup>1</sup>, Matilda Katan<sup>2</sup>, Christopher W. Dunsby<sup>1</sup>, Paul M.W. French<sup>1\*</sup>*

<sup>1</sup>Imperial College London, Dept. Physics, Photonics Lab., Blackett building, Prince Consort Road, London, SW7 2AZ, UK

<sup>2</sup>University College London, Institute of Structural and Molecular Biology, Darwin building, Gower St., London, WC1E 6BT, UK

<sup>3</sup>Imperial College London, Institute of Chemical Biology, London, SW7 2AZ, London, UK

<sup>4</sup>Université Paris Diderot, Sorbonne Paris Cité, Molécules Thérapeutiques in silico, Inserm UMR-S 973, 35 rue Helene Brion, 75013 Paris, France

\*To whom the correspondence should be addressed:

[Anca.Margineanu@imperial.ac.uk](mailto:Anca.Margineanu@imperial.ac.uk)

[paul.french@imperial.ac.uk](mailto:paul.french@imperial.ac.uk)

\*\*These authors contributed equally to this work



**Table S.1 Interface sizes (in Å<sup>2</sup>) calculated using *naccess* for the best SARAH heterodimer model of each RASSF with MST1.**

| <b>MST1<br/>with:</b> | <b>Total</b> | <b>Side chain</b> | <b>Main chain</b> | <b>Non-polar</b> | <b>Polar</b> |
|-----------------------|--------------|-------------------|-------------------|------------------|--------------|
| RASSF1                | 2844.6       | 2733.1            | 111.6             | 2350.6           | 494.1        |
| RASSF2                | 2933.6       | 2808.9            | 124.6             | 2426.5           | 507.1        |
| RASSF3                | 2767.7       | 2684.2            | 83.5              | 2235.5           | 532.2        |
| RASSF4                | 2843.2       | 2731.5            | 111.7             | 2296.2           | 547.1        |
| RASSF5                | 2820.9       | 2717.3            | 103.5             | 2278.6           | 542.2        |
| RASSF6                | 2988.4       | 2889.5            | 98.9              | 2502.1           | 486.3        |

### **Double exponential analysis of the plate measured with the Nipkow disk configuration (sectioned)**

For the double exponential analysis, the donor lifetime in the absence of FRET ( $\tau_D$ ) is calculated by averaging the values of the EGFP lifetimes obtained in the wells containing the donor only, while the values of the donor in the presence of the acceptor ( $\tau_{DA}$ ) are obtained by global analysis after fixing the donor only lifetime. These values are listed in the table S.2.

Based on the donor only lifetime  $\tau_D$  and the lifetime of the donor in the presence of the acceptor  $\tau_{DA}$ , the FRET efficiency  $E_{FRET}$  can be calculated, from which the donor-acceptor distance  $r$  is typically estimated in FRET experiments given that the Förster radius  $R_0$  is known for the specific fluorophores pair:

$$E = 1 - \frac{\tau_{DA}}{\tau_D} = \left( \frac{R_0}{r+R_0} \right)^6 \quad \text{Eq. S1}$$

The  $R_0$  estimation is generally done with the assumption that the orientation angles between the donor and acceptor molecules are randomly distributed. This is considered to be true in the case of small dye molecules that can undergo fast rotation on time scales shorter than the fluorescence lifetime. It has been recently demonstrated that in the case of fluorescent proteins this assumption cannot hold because their rotational correlation times (15-20 ns) are much longer than their fluorescence decay time (2-4 ns) (Vogel S.S., Nguyen T.A., van der Meer B.W., Blank P.S. The impact of heterogeneity and dark acceptor states on FRET: Implications for using fluorescent protein donors and acceptors. *PLoS ONE* **7**, e49593, 2012). Thus, the fluorescent proteins are constrained to a given orientation during the FRET measurements, and the orientation factor (depending on the angle between the two dipoles) must be taken into account as well as the donor-acceptor distance when calculating  $E_{FRET}$ .

As it is very difficult to measure experimentally the orientation factor, Vogel et al. (Vogel S.S., van der Meer B.W., Blank P.S. Estimating the distance separating fluorescent protein FRET pairs. *Methods* **66**, 131-138, 2013) proposed an empirical relation to determine  $r$  in the case of fluorescent proteins, and we have used this reference to obtain the values shown in table S.2.

**Table S.2. EGFP lifetimes obtained from double exponential analysis, FRET efficiencies  $E_{FRET}$  and donor-acceptor distances  $r$  for the RASSF-SARAH<sub>MST1</sub> and RASSF-full length MST1 interactions.**

|               | SARAH         |                  |            |          | MST1          |                  |            |          |
|---------------|---------------|------------------|------------|----------|---------------|------------------|------------|----------|
|               | $\tau_D$ (ps) | $\tau_{DA}$ (ps) | $E_{FRET}$ | $r$ (nm) | $\tau_D$ (ps) | $\tau_{DA}$ (ps) | $E_{FRET}$ | $r$ (nm) |
| <b>RASSF1</b> | 2632          | 781              | 0.703      | 3.8      | 2632          | 889              | 0.662      | 4.0      |
| <b>RASSF2</b> | 2682          | 956              | 0.644      | 4.1      | 2682          | 1081             | 0.597      | 4.3      |
| <b>RASSF3</b> | 2660          | 716              | 0.731      | 3.7      | 2660          | 505              | 0.810      | 3.2      |
| <b>RASSF4</b> | 2690          | 865              | 0.678      | 3.9      | 2690          | 907              | 0.663      | 4.0      |
| <b>RASSF5</b> | 2685          | 805              | 0.700      | 3.8      | 2685          | 694              | 0.741      | 3.6      |
| <b>RASSF6</b> | 2688          | 688              | 0.744      | 3.6      | 2688          | 705              | 0.734      | 3.7      |

#### Derivation of the equation for $K_D$ calculation

Dissociation constants  $K_D$  were calculated for a bi-molecular reaction as described by equation S1, where  $D$  is the donor-labelled binding partner,  $A$  is the acceptor-labelled binding partner and  $DA$  is the complex formed by their association:

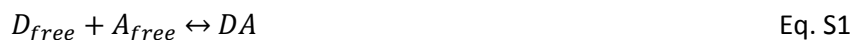

$K_D$  is then given by equation S2, which relates the concentrations of the binding partners to the complex.

$$K_D = \frac{[D_{free}][A_{free}]}{[DA]} \quad \text{Eq. S2}$$

Using the fluorophore concentration calibration (figure 10B,C in the text of the paper), we can determine the total donor ( $D_{total}$ ) and acceptor ( $A_{total}$ ) concentrations, while the FRET fraction  $\beta$  obtained from the

FLIM global analysis provides an estimate of the concentration of the  $DA$  complex via the bound fraction of the donor.

We can then write:

$$[DA] = \beta D_{total} \quad \text{Eq. S3}$$

$$[DA] = \gamma A_{total} \quad \text{Eq. S4}$$

where  $\gamma$  is the bound fraction of the acceptor molecules within the complex. From the equality of Eq. S3 and S4, this fraction can be determined:

$$\gamma = \frac{\beta D_{total}}{A_{total}} \quad \text{Eq. S5}$$

Knowing the bound  $D$  and  $A$  fractions, we can obtain the free fractions:

$$[D_{free}] = (1 - \beta) D_{total} \quad \text{Eq. S6}$$

$$[A_{free}] = (1 - \gamma) A_{total} = \left(1 - \frac{\beta D_{total}}{A_{total}}\right) A_{total} \quad \text{Eq. S7}$$

Replacing Eq. S6 and S7 in the  $K_D$  expression, we obtain:

$$K_d = \frac{[D_{free}][A_{free}]}{[DA]} = \frac{(1-\beta) D_{total} \left(1 - \frac{\beta D_{total}}{A_{total}}\right) A_{total}}{\beta D_{total}} = \frac{(1-\beta) \left(1 - \beta \frac{c_D I_D}{c_A I_A}\right) c_A I_A}{\beta} \quad \text{Eq. S8}$$

where  $I_D$  and  $I_A$  are the initial fluorescence intensity of the donor and the acceptor respectively, which are linearly proportional to the donor and acceptor concentrations via the proportionality constants  $c_D$  and  $c_A$  (as shown in figure 10B,C in the text of the paper).

### Tables of changes in donor fluorescence lifetime

Tables S.3-S.5 compare the difference in EGFP lifetime between RASSF proteins interacting with SARAH<sub>MST1</sub> and the negative control (MST1 $\Delta$ SARAH or mCherry).

**Table S.3. Differences in mean fluorescence lifetimes between RASSF1-10 interacting with SARAH<sub>MST1</sub> and the negative control (MST1ΔSARAH) (same data as presented in figure 4 in the text of the paper).**

|         | Mean difference in EGFP lifetime (ps) |
|---------|---------------------------------------|
| RASSF1  | 233                                   |
| RASSF2  | 244                                   |
| RASSF3  | 279                                   |
| RASSF4  | 248                                   |
| RASSF5  | 314                                   |
| RASSF6  | 138                                   |
| RASSF7  | 25                                    |
| RASSF8  | 6                                     |
| RASSF9  | 12                                    |
| RASSF10 | 27                                    |

**Table S.4. Mean lifetime differences between RASSF1 mutants interacting with SARAH<sub>MST1</sub> and with the negative control (mCherry) (data presented in figure 5 in the text of the paper).**

|              | Mean difference of EGFP lifetime (ps) |
|--------------|---------------------------------------|
| RASSF1       | 240                                   |
| RASSF1 L301P | 2                                     |
| RASSF1 L305P | 5                                     |
| RASSF1 L308P | 17                                    |

**Table S.5. Mean lifetime differences between RASSF5 mutants interacting with SARAH<sub>MST1</sub> and with the negative control (mCherry) (data presented in figure 6 in the text of the paper).**

|              | Mean difference of EGFP lifetime (ps) |
|--------------|---------------------------------------|
| RASSF5       | 294                                   |
| RASSF5 L224P | 201                                   |
| RASSF5 L228P | 109                                   |
| RASSF5 L231P | 165                                   |

### **Examples of dissociation constants $K_D$ for homo- and heterodimerisation of RASSF and MST proteins from literature data**

The following data have been taken from references 26 and 39-41, as numbered in the text of the paper. NORE1 is the alternative name for RASSF5. The numbers between brackets represent the aminoacid sequence that was used in the study. Point mutations (e.g. L<sup>444</sup>P) are also indicated. Abbreviations: NMR = nuclear magnetic resonance, ITC = Isothermal titration calorimetry, SFF = stopped-flow fluorimetry, CD = circular dichroism, CPM = 7-diethylamino-3-(4' maleimidylphenyl)-4-methylcoumarin, FM = fluorescein-5-maleimide, eCFP = enhanced cyan fluorescent protein, eYFP = enhanced yellow fluorescent protein.

**Table S.7.  $K_D$  values for NORE1 (RASSF5) and MST1 homo- and heterodimerisation published in literature.**



| Protein1                                                               | Protein2                                                               | K <sub>D</sub> (μM)                             | Method      | Ref. |
|------------------------------------------------------------------------|------------------------------------------------------------------------|-------------------------------------------------|-------------|------|
| RASSF5 SARAH<br>(366-413)                                              | MST1 SARAH<br>(432-480)                                                | Low nM range                                    | NMR         | 26   |
| NORE1 SARAH<br>(369-413)                                               | NORE1 SARAH<br>(369-413)                                               | 34.4 ± 16.4 (at 25°C)<br>154.5 ± 20.5 (at 30°C) | ITC         | 39   |
| MST1 Inhibitory+SARAH<br>(330-487) L <sup>444</sup> P                  | MST1 Inhibitory+SARAH<br>(330-487) L <sup>444</sup> P                  | 34.1 ± 4.6 (at 25°C)                            | ITC         | 39   |
| NORE1 RBD+SARAH<br>(199-413) C <sup>220</sup> S/R <sup>242</sup> C-CPM | NORE1 RBD+SARAH (199-<br>413) C <sup>220</sup> S/R <sup>242</sup> C-FM | 3.8                                             | FRET in SFF | 39   |
| NORE1 RBD+SARAH<br>(199-413) C <sup>220</sup> S/R <sup>242</sup> C-CPM | NORE1 RBD+SARAH<br>(199-413) C <sup>220</sup> S/C <sup>414</sup> -FM   | 4.7                                             | FRET in SFF | 39   |
| NORE1 RBD+SARAH<br>(199-413) C <sup>220</sup> S/C <sup>414</sup> -CPM  | NORE1 RBD+SARAH<br>(199-413) C <sup>220</sup> S/C <sup>414</sup> -FM   | 9.8                                             | FRET in SFF | 39   |
| NORE1 RBD+SARAH<br>(199-413) C <sup>220</sup> S/R <sup>242</sup> C-CPM | NORE1 SARAH<br>(369-413) C <sup>220</sup> S/C <sup>414</sup> -eYFP     | 3.1                                             | FRET in SFF | 39   |
| NORE1 RBD+SARAH<br>(199-413) C <sup>220</sup> S/C <sup>414</sup> -CPM  | NORE1 SARAH<br>(369-413) C <sup>220</sup> S/C <sup>414</sup> -eYFP     | 8.3                                             | FRET in SFF | 39   |
| MST1 Inhibitory+SARAH<br>(330-487) F <sup>487</sup> C-CPM              | MST1 SARAH<br>(437-487)-eYFP                                           | Low nM range                                    | FRET in SFF | 39   |
| MST1 Inhibitory+SARAH<br>(330-487) E <sup>460</sup> C-CPM              | MST1 Inhibitory+SARAH<br>(330-487) E <sup>460</sup> C-FM               | Low nM range                                    | FRET in SFF | 39   |
| NORE1 SARAH<br>(369-413)-eCFP                                          | MST1 SARAH<br>(437-487)-eYFP                                           | 0.2                                             | FRET in SFF | 39   |
| NORE1 SARAH<br>(369-413)-eCFP                                          | MST1 Inhibitory+SARAH<br>(330-487)-eYFP                                | 0.6                                             | FRET in SFF | 39   |
| NORE1 RBD+SARAH<br>(199-413) C <sup>220</sup> S/C <sup>414</sup> -CPM  | MST1 SARAH<br>(437-487)-eYFP                                           | 0.7                                             | FRET in SFF | 39   |
| NORE1 SARAH<br>(369-413)-eCFP                                          | MST1 SARAH<br>(437-487) L <sup>444</sup> P-eYFP                        | 0.6                                             | FRET in SFF | 39   |
| MST1 SARAH<br>(437-487)                                                | MST1 SARAH<br>(437-487)                                                | 1.07 ± 0.7                                      | CD          | 40   |

|                          |                          |           |     |    |
|--------------------------|--------------------------|-----------|-----|----|
| MST1 SARAH<br>(437-487)  | MST1 SARAH<br>(437-487)  | 0.9 ± 0.1 | ITC | 40 |
| NORE1 SARAH<br>(370-413) | NORE1 SARAH<br>(370-413) | 28        | CD  | 41 |
